# Supplementary material
Source: HighWire-hosted journal article supplement (http://www.cmaj.ca/highwire/filestream/59202/field_highwire_adjunct_files/5/strep-cohen-3-at.pdf)
Supplement: strep-cohen-3-at.pdf [file strep-cohen-3-at.pdf]

### **Appendix 3 (as supplied by the authors): Definition of the target zone of accuracy and generation of study objectives**

#### **Step 1: Set a priority between sensitivity and specificity and provide rationale**

Sensitivity  or Specificity

Rationale: clinicians do not want to miss group A *Streptococcus* (GAS) cases that could transmit the bacterium to other individuals and/or lead to complications.

#### **Step 2: Define a minimally acceptable value for sensitivity and provide rationale**

Minimally acceptable sensitivity = 85%

Rationale: Several clinical experts consider that diagnostic strategies for sore throat in children should be at least 80-90% sensitive [1-4].

#### **Step 3: Define a minimally acceptable value for specificity and provide rationale**

Minimally acceptable specificity = 85%

Rationale: Assuming a population of a 100 children with pharyngitis and a GAS prevalence of 35%, a diagnostic strategy with 85% sensitivity would lead to 30 prescriptions for antibiotic therapy for 100 patients. We aim to identify a diagnostic strategy that could reduce the antibiotics consumption (baseline  $\geq 60\%$ ) [5-7]. If we set the maximum acceptable antibiotics prescription rate to 40%, then the maximum acceptable number of antibiotics prescribed for GAS-negative patients would be 10 for 65 patients, for a specificity of 85%.

#### **Step 4: Clearly define study objectives**

We aimed to identify a CPR-based selective testing strategy that would be at least 85% sensitive and 85% specific. We tested this by assessing whether the one-sided rectangular 95% confidence region for (sensitivity, specificity) lies entirely within the pre-specified target zone of accuracy [8].

#### **References**

1. Armengol CE, Schlager TA, Hendley JO: **Sensitivity of a rapid antigen detection test for group A streptococci in a private pediatric office setting: answering the Red Book's request for validation.** *Pediatrics* 2004, **113**:924-926.
2. Matthys J, De Meyere M: **Clinical scores to predict streptococcal pharyngitis: believers and nonbelievers.** *JAMA internal medicine* 2013, **173**:77-78.
3. Shulman ST, Bisno AL, Clegg HW, Gerber MA, Kaplan EL, Lee G, Martin JM, Van Beneden C: **Clinical practice guideline for the diagnosis and management of group A streptococcal pharyngitis: 2012 update by the Infectious Diseases Society of America.** *Clin Infect Dis* 2012, **55**:e86-e102.

4. Ehrlich JE, Demopoulos BP, Daniel KR, Jr., Ricarte MC, Glied S: **Cost-effectiveness of treatment options for prevention of rheumatic heart disease from Group A streptococcal pharyngitis in a pediatric population.** *Prev Med* 2002, **35**:250-257.
5. Grijalva CG, Nuorti JP, Griffin MR: **Antibiotic prescription rates for acute respiratory tract infections in US ambulatory settings.** *JAMA* 2009, **302**:758-766.
6. Linder JA, Bates DW, Lee GM, Finkelstein JA: **Antibiotic treatment of children with sore throat.** *JAMA* 2005, **294**:2315-2322.
7. McCaig LF, Besser RE, Hughes JM: **Trends in antimicrobial prescribing rates for children and adolescents.** *JAMA* 2002, **287**:3096-3102.
8. Pepe MS: *The statistical evaluation of medical tests for classification and prediction.* Oxford, U.K: Oxford University Press; 2003.
